# Supplementary material for: Multiply-functionalized graphene oxide on-line pass-through cleanup for the fast determination of aconitum alkaloids in human plasma by LC-MS/MS
Source: Royal Society of Chemistry journal article supplement (doi:10.1039/c9ay00802k), 2019-01-01
Supplement: c9ay00802k1.pdf [file c9ay00802k1.pdf]

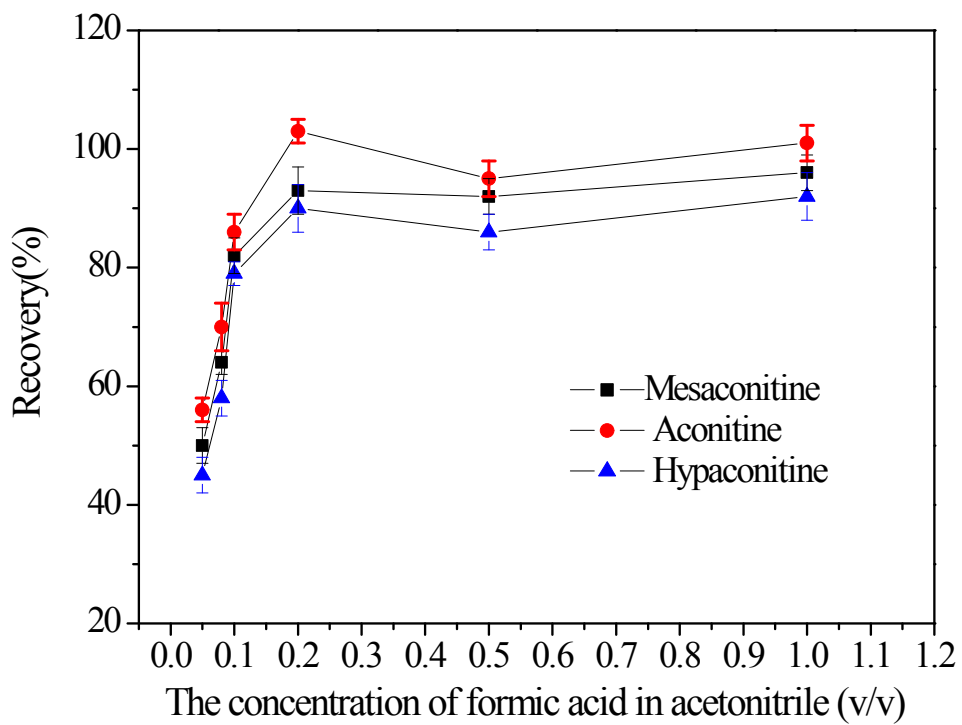

**Fig. S1** Effect of the concentration of formic acid in acetonitrile on the recoveries of 3 aconitum alkaloids

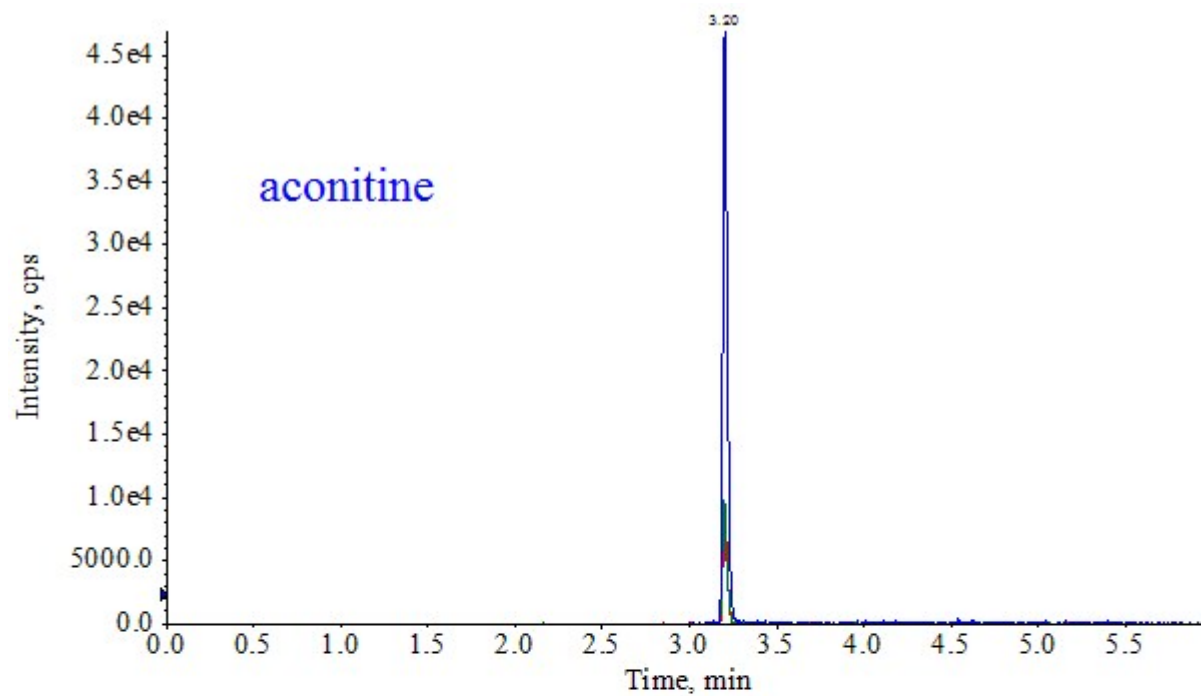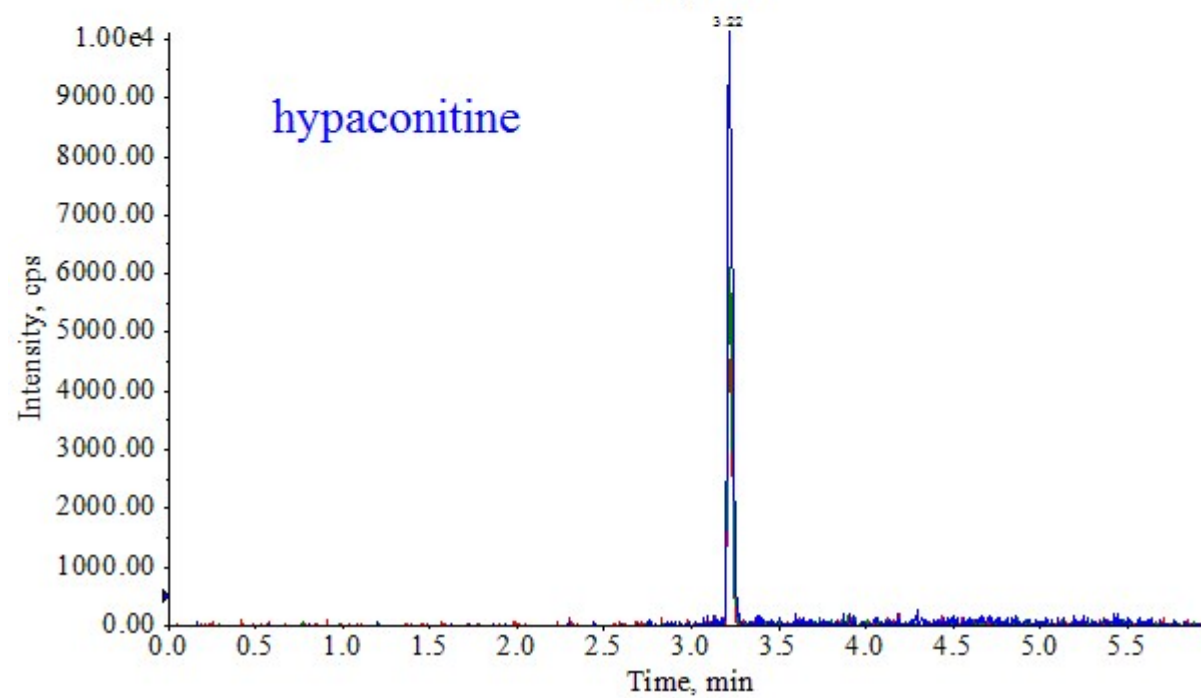

**Fig. S2** The MRM chromatograms for one typical sample
